# Supplementary material for: Photochromism and photoswitchable luminescence in a Zn7 cluster-based metal–organic framework with an organic guest
Source: Royal Society of Chemistry journal article supplement (doi:10.1039/d1dt03213e), 2021-01-01
Supplement: d1dt03213e1.pdf [file d1dt03213e1.pdf]

## Photochromism and photoswitchable luminescence in a Zn<sub>7</sub> cluster-based metal-organic framework with organic guest

Jian-Jun Liu\*, Jia-Jia Fu, Teng Liu, Chi-Xian He and Feixiang Cheng\*

College of Chemistry and Environmental Science, Qujing Normal University, Qujing 655011, China.

E-mail: chengfx2019@163.com (F.-X Cheng); jjliu302@163.com (J.-J. Liu)

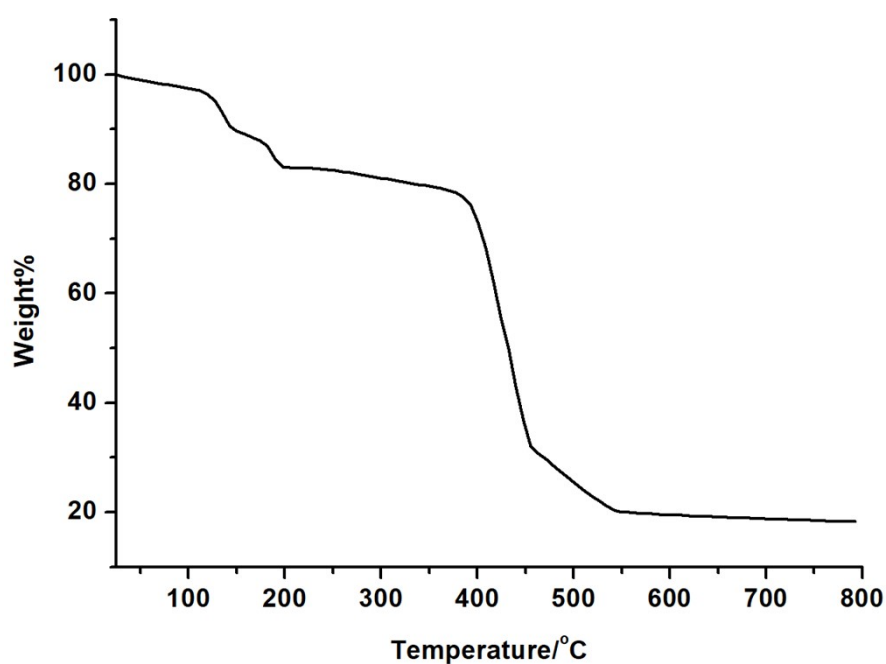

Fig. S1 TGA curve of compound 1.

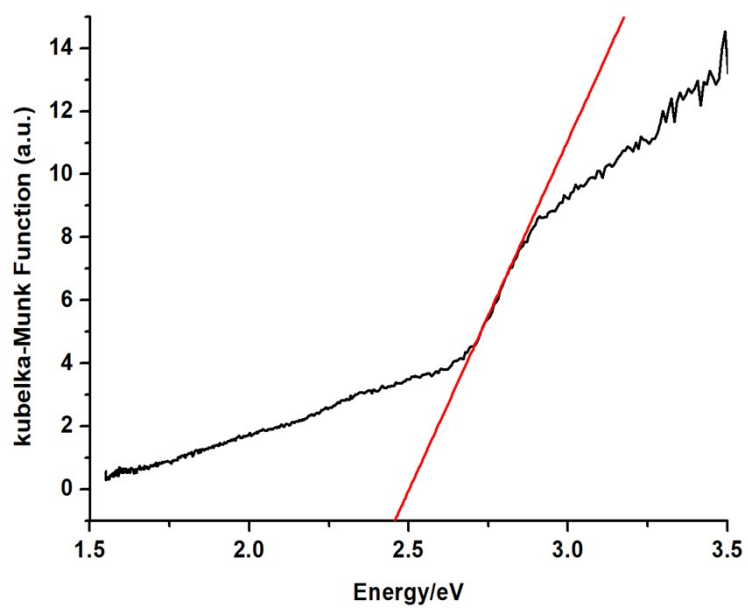

Fig. S2 Optical absorption spectra of compounds **1**.

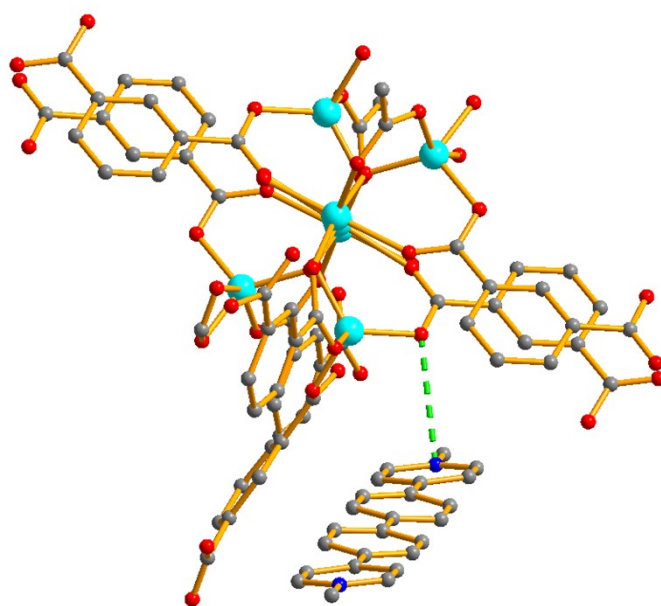

Fig. S3 Distance between the carboxylate O atom of the IPA<sup>2-</sup> ligand and adjacent pyridinium N atom in compound **1**.

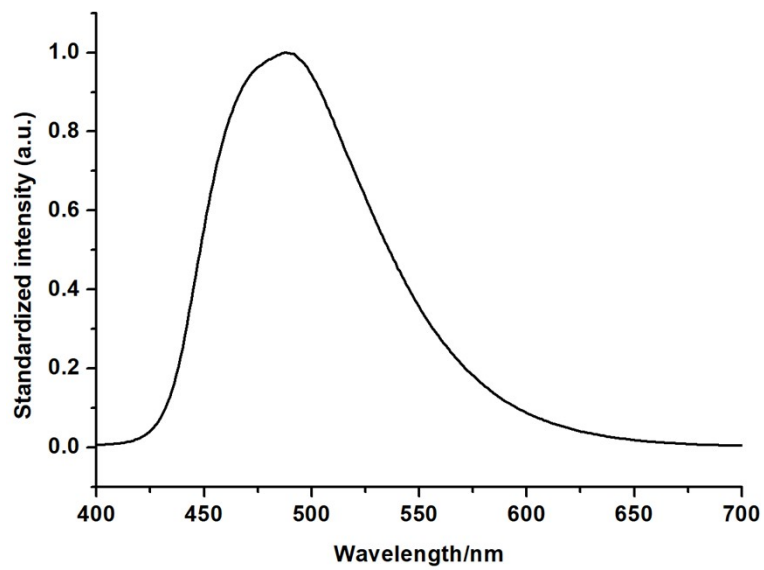

Fig. S4 The luminescent spectrum of bbmp·2I ( $\lambda_{\text{ex}} = 370$  nm).

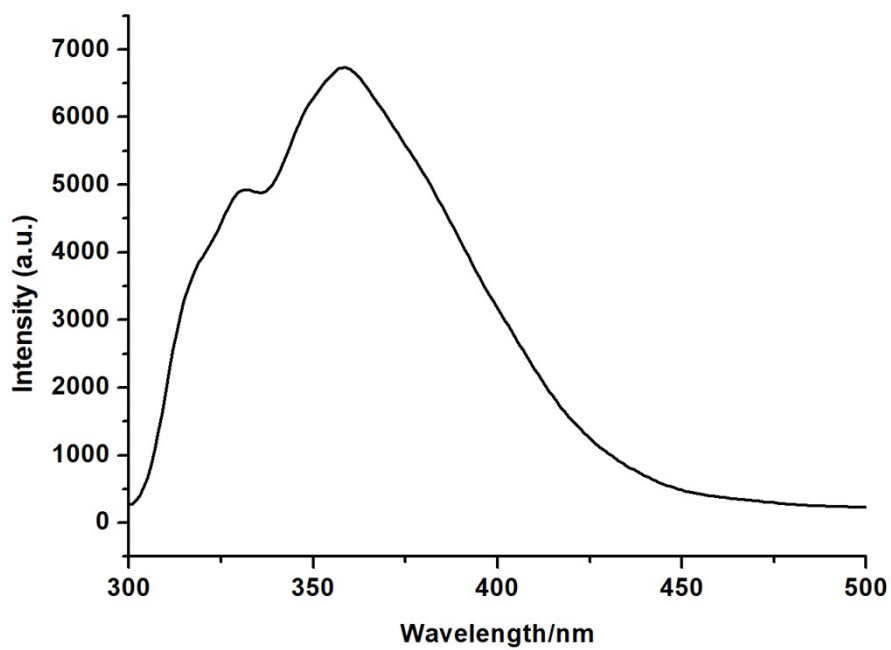

Fig. S5. The luminescent spectra of H<sub>2</sub>IPA ligand ( $\lambda_{\text{ex}} = 280$  nm).

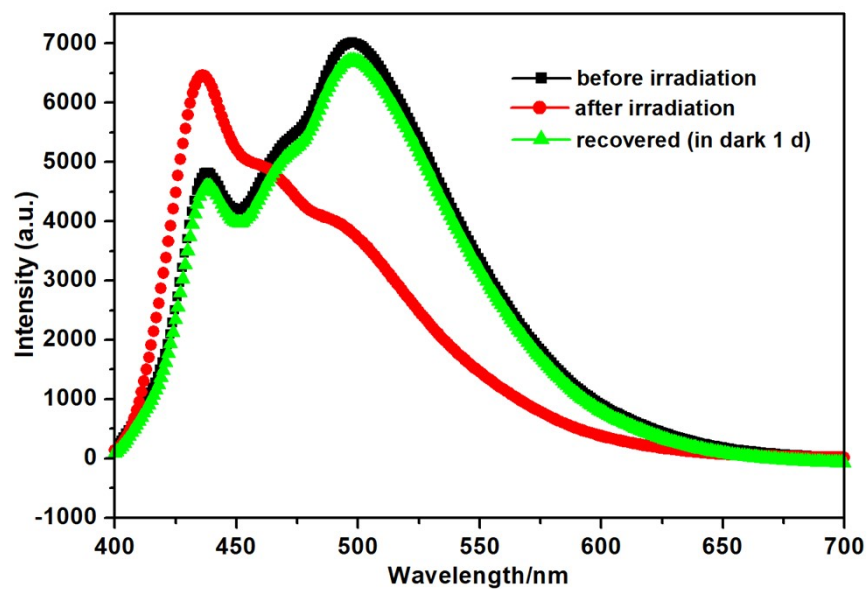

Fig. S6. Luminescent emission spectra of before irradiation, after irradiation, and decolorized sample of compound **1**.

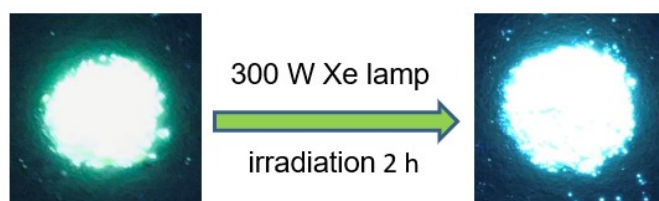

Fig. S7. Photos showing luminescence changes after UV-Vis light irradiation of compound **1** (under a 365 nm UV lamp).
